# Supplementary material for: Chemical and Quality Analysis of Beauty Tea Processed from Fresh Leaves of Tieguanyin Variety with Different Puncturing Degrees
Source: MDPI journal article supplement (doi:10.3390/foods12091737), 2023-04-22
Supplement: s1 [file s1]

**Table S1. The information on 95 non-volatile differential metabolites in fresh tea leaves.**

| metabolite name                                                           | TR<br>(min) | accurate<br>mass | theoretica<br>l mass | ppm   | MS/MS ions                                       | formula                                         | Ref. |
|---------------------------------------------------------------------------|-------------|------------------|----------------------|-------|--------------------------------------------------|-------------------------------------------------|------|
| <b>Catechins and their derivatives</b>                                    |             |                  |                      |       |                                                  |                                                 |      |
| 8-C-Ascorbylepi<br>gallocatechin<br>3-gallate                             | 4.57        | 631.0938         | 631.0941             | -0.43 | 163.0037,495.0568                                | C <sub>28</sub> H <sub>24</sub> O <sub>17</sub> |      |
| (-)-Epigallocatec<br>hin                                                  | 4.60        | 306.0735         | 305.0667             | -1.36 | 305.0664                                         | C <sub>15</sub> H <sub>14</sub> O <sub>7</sub>  |      |
| (-)-Gallocatechin                                                         | 5.76        | 306.0739         | 305.0667             | -0.25 | 125.0243,305.0665                                | C <sub>15</sub> H <sub>14</sub> O <sub>7</sub>  |      |
| Epigallocatechin<br>gallate                                               | 5.77        | 457.0776         | 457.0776             | 0.01  | 169.0141,125.0243,305.0664                       | C <sub>22</sub> H <sub>18</sub> O <sub>11</sub> |      |
| Epicatechin<br>3-glucoside                                                | 8.26        | 452.1319         | 451.1246             | 0.04  | 271.0607,169.0142,125.0244,28<br>9.0717          | C <sub>21</sub> H <sub>24</sub> O <sub>11</sub> |      |
| 3,5-Digalloylepic<br>atechin                                              | 8.26        | 593.0930         | 593.0937             | -1.12 | 423.0721,441.0824,593.0940                       | C <sub>29</sub> H <sub>22</sub> O <sub>14</sub> |      |
| Epicatechin-(4be<br>ta->8)-gallocatec<br>hin                              | 4.41        | 593.1289         | 593.1301             | -1.98 | 305.0663,441.0827                                | C <sub>30</sub> H <sub>26</sub> O <sub>13</sub> |      |
| Gallocatechin-(4<br>alpha->8)-epicate<br>chin                             | 4.65        | 593.1288         | 593.1301             | -2.17 | 407.0770,289.0714,441.0823                       | C <sub>30</sub> H <sub>26</sub> O <sub>13</sub> |      |
| Epigallocatechin<br>-(4beta->8)-epica<br>techin<br>3-O-gallate            | 5.64        | 745.1394         | 745.1410             | -2.23 | 407.0769,467.0980,593.1289                       | C <sub>37</sub> H <sub>30</sub> O <sub>17</sub> |      |
| ent-Epicatechin-(<br>4alpha->8)-ent-e<br>picatechin<br>3'-gallate         | 5.66        | 775.1492         | 729.1461             | -3.21 | 407.0768,577.0983,289.0714                       | C <sub>37</sub> H <sub>30</sub> O <sub>16</sub> |      |
| Theasinensin A                                                            | 5.81        | 913.1451         | 913.1469             | -2.02 | 457.0774,169.0142,125.0243,30<br>5.0666          | C <sub>44</sub> H <sub>34</sub> O <sub>22</sub> |      |
| Epigallocatechin<br>3-O-gallate-(4bet<br>a->6)-epicatechin<br>3-O-gallate | 6.17        | 898.1615         | 897.1520             | 2.47  | 745.1389,897.1498,727.1283,55<br>9.0880          | C <sub>44</sub> H <sub>34</sub> O <sub>21</sub> |      |
| <b>Flavones and flavonols/their glycoside</b>                             |             |                  |                      |       |                                                  |                                                 |      |
| 5-hydroxypseud<br>obaptigenin                                             | 2.46        | 343.0461         | 297.0405             | 0.68  | 169.0141,170.0221,177.0194                       | C <sub>16</sub> H <sub>10</sub> O <sub>6</sub>  |      |
| (2S)-dihydrotrice<br>tin                                                  | 3.49        | 304.0585         | 303.0510             | 0.57  | 125.0242,305.0663,137.0242,16<br>5.0190,167.0346 | C <sub>15</sub> H <sub>12</sub> O <sub>7</sub>  |      |
| Quercetin<br>3-(3-p-coumaroy                                              | 3.78        | 609.1235         | 609.1250             | -2.40 | 423.0718,305.0665,407.0774,12<br>5.0244          | C <sub>30</sub> H <sub>26</sub> O <sub>14</sub> |      |

|                                                |      |          |          |       |                               |                                                 |
|------------------------------------------------|------|----------|----------|-------|-------------------------------|-------------------------------------------------|
| Iglucoside)                                    |      |          |          |       |                               |                                                 |
| Myricetin                                      |      |          |          |       | 271.0454,169.0141,313.0563,21 |                                                 |
| 7-(6"-galloylglucoside)                        | 4.77 | 631.0941 | 631.0941 | -0.00 | 1.0242                        | C <sub>28</sub> H <sub>24</sub> O <sub>17</sub> |
| Eriodictyol                                    |      |          |          |       | 124.0164,347.0778,183.0296,44 |                                                 |
| 7-(6-galloylglucoside)                         | 4.98 | 601.1201 | 601.1199 | 0.41  | 9.0981                        | C <sub>28</sub> H <sub>26</sub> O <sub>15</sub> |
| Isorhamnetin                                   |      |          |          |       | 303.0511,285.0402,321.0614,47 |                                                 |
| 4'-O-glucuronide                               | 5.36 | 473.0724 | 491.0831 | -0.29 | 3.0742                        | C <sub>22</sub> H <sub>20</sub> O <sub>13</sub> |
| Eriocitrin                                     | 5.86 | 595.1658 | 595.1668 | -1.80 | 401.0761,327.0515,473.1082,43 | C <sub>27</sub> H <sub>32</sub> O <sub>15</sub> |
|                                                |      |          |          |       | 3.1350                        |                                                 |
| Safflor Yellow A                               | 5.87 | 593.1501 | 593.1512 | -1.81 | 593.1503,357.0862,453.1027,19 | C <sub>27</sub> H <sub>30</sub> O <sub>15</sub> |
|                                                |      |          |          |       | 1.0559                        |                                                 |
| 6"-O-Galloylquercimeritrin                     | 5.91 | 615.1002 | 615.0992 | 1.67  | 559.1239,327.0514             | C <sub>28</sub> H <sub>24</sub> O <sub>16</sub> |
| Quercetin                                      |      |          |          |       |                               |                                                 |
| 7-glucuronide                                  | 6.09 | 605.1137 | 623.1254 | -1.74 | 453.1029,591.1140,573.1028    | C <sub>27</sub> H <sub>28</sub> O <sub>17</sub> |
| 3-rhamnoside                                   |      |          |          |       |                               |                                                 |
| Prunin                                         |      |          |          |       |                               |                                                 |
| 6"-O-gallate                                   | 6.14 | 585.1250 | 585.1250 | -0.02 | 465.0670,169.0141,313.0565    | C <sub>28</sub> H <sub>26</sub> O <sub>14</sub> |
| Quercetin                                      |      |          |          |       |                               |                                                 |
| 3-[rhamnosyl-(1->2)-alpha-L-arabinopyranoside] | 6.35 | 625.1400 |          | -1.78 | 625.1399                      | C <sub>26</sub> H <sub>28</sub> O <sub>15</sub> |
| Myricetin                                      |      |          |          |       |                               |                                                 |
| 3-galactoside                                  | 6.36 | 480.0901 | 479.0831 | -0.66 | 316.0222                      | C <sub>21</sub> H <sub>20</sub> O <sub>13</sub> |
| Kaempferol                                     |      |          |          |       |                               |                                                 |
| 3-rhamnoside                                   | 6.75 | 589.1193 | 607.1305 | -1.05 | 413.0873                      | C <sub>27</sub> H <sub>28</sub> O <sub>16</sub> |
| 7-galacturonide                                |      |          |          |       |                               |                                                 |
| Hydroxysafflor yellow A                        | 6.75 | 593.1503 | 611.1618 | -1.45 | 593.1497,413.0873,293.0453    | C <sub>27</sub> H <sub>32</sub> O <sub>16</sub> |
| Scoparin                                       |      |          |          |       |                               |                                                 |
| 2"-xyloside                                    | 6.83 | 594.1574 | 593.1512 | -1.77 | 413.0875,593.1497,293.0453    | C <sub>27</sub> H <sub>30</sub> O <sub>15</sub> |
| Hibiscitrin                                    | 6.89 | 477.0673 | 495.0780 | -0.42 | 315.0146,169.0141,125.0243,47 | C <sub>21</sub> H <sub>20</sub> O <sub>14</sub> |
|                                                |      |          |          |       | 7.0673                        |                                                 |
| Kaempferol                                     |      |          |          |       |                               |                                                 |
| 3-arabinofuranoside                            |      |          |          |       |                               |                                                 |
| ide                                            | 6.92 | 563.1401 | 563.1406 | -0.87 | 169.0141,563.1403             | C <sub>26</sub> H <sub>28</sub> O <sub>14</sub> |
| 7-rhamnofuranoside                             |      |          |          |       |                               |                                                 |
| Isoengeltin                                    | 6.94 | 415.1027 | 433.1140 | -1.74 | 125.0242,269.0457,287.0562,29 | C <sub>21</sub> H <sub>22</sub> O <sub>10</sub> |
|                                                |      |          |          |       | 3.0457                        |                                                 |
| Galangin                                       |      |          |          |       | 609.1450,577.1552,413.0875,29 |                                                 |
| 3-[galactosyl-(1->                             | 7.04 | 578.1628 | 577.1563 | -1.34 | 3.0453                        | C <sub>27</sub> H <sub>30</sub> O <sub>14</sub> |

|                                                      |      |          |           |       |                               |                                                 |
|------------------------------------------------------|------|----------|-----------|-------|-------------------------------|-------------------------------------------------|
| 4)-rhamnoside]                                       |      |          |           |       |                               |                                                 |
| Kaempferol                                           |      |          |           |       | 755.2026,609.1449,577.1551,41 |                                                 |
| 3-gentiobioside                                      | 7.05 | 756.2093 | 755.2040  | -2.58 | 3.0874                        | C <sub>33</sub> H <sub>40</sub> O <sub>20</sub> |
| 7-rhamnoside                                         |      |          |           |       |                               |                                                 |
| Plantagoside                                         | 7.09 | 465.1033 | 465.1039  | -1.20 | 313.0918,151.0037,465.1017    | C <sub>21</sub> H <sub>22</sub> O <sub>12</sub> |
| 2''-O-Acetylisoorientin                              | 7.31 | 471.0931 | 489.1039  | -0.42 | 305.0668,161.0245,327.0518,40 | C <sub>23</sub> H <sub>22</sub> O <sub>12</sub> |
|                                                      |      |          |           |       | 1.0887,413.0888               |                                                 |
| Astilbin                                             | 7.35 | 449.1088 | 449.1089  | -0.36 | 285.0401,287.0552,286.0436,15 | C <sub>21</sub> H <sub>22</sub> O <sub>11</sub> |
|                                                      |      |          |           |       | 1.0038                        |                                                 |
| Limocitrin                                           | 7.35 | 489.1039 | 507.1144  | 0.16  | 285.0401,287.0552,286.0436,15 | C <sub>23</sub> H <sub>24</sub> O <sub>13</sub> |
| 3-glucoside                                          |      |          |           |       | 1.0038                        |                                                 |
| Isorhamnetin                                         |      |          |           |       |                               |                                                 |
| 3-(2G-apiosylrutinoside)                             | 7.35 | 756.2098 | 899.1583  | -2.03 | 755.2021,285.0401             | C <sub>33</sub> H <sub>40</sub> O <sub>20</sub> |
| Kaempferol                                           |      |          |           |       |                               |                                                 |
| 3-O-alpha-L-rhamnofuranoside                         | 7.52 | 477.1038 | 431.0984  | -0.08 | 169.0143                      | C <sub>21</sub> H <sub>20</sub> O <sub>10</sub> |
| 6''-(4-Carboxy-3-hydroxy-3-methylbutanoyl)hyperin    | 7.64 | 589.1192 | 607.1305  | -1.15 | 300.0275,437.1089             | C <sub>27</sub> H <sub>28</sub> O <sub>16</sub> |
| NICTOFLORIN                                          | 7.68 | 593.1498 | 593.1512  | -3.86 | 593.1503,285.0399,284.0323,44 | C <sub>27</sub> H <sub>30</sub> O <sub>15</sub> |
|                                                      |      |          |           |       | 7.0929                        |                                                 |
| Carthamone                                           | 7.69 | 448.1003 | 447.0933  | -0.58 | 285.0397,593.1501,284.0322,44 | C <sub>21</sub> H <sub>20</sub> O <sub>11</sub> |
|                                                      |      |          |           |       | 7.0933                        |                                                 |
| Astragalin                                           | 7.93 | 447.0931 | 447.0933  | -0.41 | 284.0324,255.0294,227.0347    | C <sub>21</sub> H <sub>20</sub> O <sub>11</sub> |
| Naringin                                             | 8.20 | 579.1719 | 579.1719  | -0.12 | 579.1714,459.1144             | C <sub>27</sub> H <sub>32</sub> O <sub>14</sub> |
| Isolariciresinol                                     |      |          |           |       |                               |                                                 |
| 4'-O-beta-D-glucoside                                | 8.35 | 522.2099 | 521.2028  | -0.33 | 341.1393,279.0876             | C <sub>26</sub> H <sub>34</sub> O <sub>11</sub> |
| Kaempferol                                           |      |          |           |       |                               |                                                 |
| 3-(6-acetylgalactoside)                              | 8.43 | 489.1031 | 489.1039  | -1.43 | 284.0324,489.1038,255.0299    | C <sub>23</sub> H <sub>22</sub> O <sub>12</sub> |
| 2'-C-Methylmyricetin                                 |      |          |           |       |                               |                                                 |
| 3-rhamnoside                                         | 8.43 | 629.1143 | 629.1148  | -0.79 | 284.0322,285.0395,169.0147,48 | C <sub>29</sub> H <sub>26</sub> O <sub>16</sub> |
| 5'-gallate                                           |      |          |           |       | 9.1036,629.1141               |                                                 |
| Kaempferol                                           |      |          |           |       |                               |                                                 |
| 3-neohesperidoside-7-(2''-p-coumaryllaminaribioside) | 9.37 | 531.1442 | 1063.2936 | 1.90  | 755.1829,901.2385,431.0979,14 | C <sub>48</sub> H <sub>56</sub> O <sub>27</sub> |
|                                                      |      |          |           |       | 5.0293                        |                                                 |
| Quercetin                                            | 9.65 | 917.2340 | 917.2357  | -1.85 | 285.0402,885.2441,739.1860,43 | C <sub>42</sub> H <sub>46</sub> O <sub>23</sub> |
| 3-(6-[4-glucosyl-                                    |      |          |           |       | 1.0981,145.0294               |                                                 |

|                                                     |       |          |          |       |                            |                                                  |
|-----------------------------------------------------|-------|----------|----------|-------|----------------------------|--------------------------------------------------|
| p-coumaryl]glucosyl)(1->2)-rhamnoside<br>Kaempferol |       |          |          |       |                            |                                                  |
| 2G-coumaroylrutinoside<br>Kaempferol                | 9.80  | 739.1859 | 739.1880 | -2.85 | 285.0403,593.1306,739.1868 | C <sub>36</sub> H <sub>36</sub> O <sub>17</sub>  |
| 3-neohesperidoside-7-(2"-p-coumarylglucoside)       | 10.42 | 901.2383 | 901.2408 | -2.74 | 901.2395,635.1418          | C <sub>42</sub> H <sub>46</sub> O <sub>22</sub>  |
| Hordatine B                                         | 15.43 | 561.2918 | 579.3049 | -4.41 | 487.2386,488.2390          | C <sub>29</sub> H <sub>40</sub> N <sub>8</sub> O |

5

#### Phenolic acids

|                                       |      |          |          |       |                                              |                                                 |
|---------------------------------------|------|----------|----------|-------|----------------------------------------------|-------------------------------------------------|
| Glucinol                              | 0.75 | 342.1163 | 341.1089 | 0.15  | 179.0558,311.0982,161.0454                   | C <sub>12</sub> H <sub>22</sub> O <sub>11</sub> |
| Chlorogenic acid                      | 4.21 | 353.0880 | 353.0878 | 0.51  | 151.0559,179.0349,135.0452                   | C <sub>16</sub> H <sub>18</sub> O <sub>9</sub>  |
| Sanguin H4                            | 5.02 | 634.0819 | 633.0733 | 1.99  | 300.9986,302.0020,633.0715,463.0510          | C <sub>27</sub> H <sub>22</sub> O <sub>18</sub> |
| 1-O-p-Coumaroyl-beta-D-glucose        | 5.21 | 325.0933 | 325.0929 | 1.22  | 169.0142,145.0294                            | C <sub>15</sub> H <sub>18</sub> O <sub>8</sub>  |
| 3-O-p-Coumaroylquinic acid            | 5.96 | 337.0931 | 337.0929 | 0.56  | 173.0453                                     | C <sub>16</sub> H <sub>18</sub> O <sub>8</sub>  |
| Gallic acid                           | 6.04 | 169.0142 | 169.0143 | -0.51 | 125.0242                                     | C <sub>7</sub> H <sub>6</sub> O <sub>5</sub>    |
| corilagin                             | 6.15 | 634.0832 | 633.0733 | 3.98  | 465.0669,169.0140,483.0775,313.0564,125.0243 | C <sub>27</sub> H <sub>22</sub> O <sub>18</sub> |
| trans-5-O-(4-coumaroyl)-D-quinic acid | 6.63 | 337.0934 | 337.0929 | 1.50  | 191.0558,192.0600                            | C <sub>16</sub> H <sub>18</sub> O <sub>8</sub>  |

#### Amino acids

|            |      |          |          |       |          |                                                              |
|------------|------|----------|----------|-------|----------|--------------------------------------------------------------|
| L-Theanine | 1.15 | 174.1004 | 173.0932 | -0.18 | 173.0931 | C <sub>7</sub> H <sub>14</sub> N <sub>2</sub> O <sub>3</sub> |
|------------|------|----------|----------|-------|----------|--------------------------------------------------------------|

Authentic standard

#### Organic acids

|                              |      |          |          |       |                   |                                               |
|------------------------------|------|----------|----------|-------|-------------------|-----------------------------------------------|
| Ethyl aconitate              | 4.99 | 183.0296 | 201.0405 | -1.38 | 124.0165,183.0293 | C <sub>8</sub> H <sub>10</sub> O <sub>6</sub> |
| 2,4,6-Trihydroxybenzoic acid | 5.77 | 169.0141 | 169.0143 | -0.58 | 169.0141,125.0243 | C <sub>7</sub> H <sub>6</sub> O <sub>5</sub>  |

#### Proanthocyanidins

|                                 |      |          |          |       |                                              |                                                 |
|---------------------------------|------|----------|----------|-------|----------------------------------------------|-------------------------------------------------|
| Prodelphinidin A1               | 3.79 | 607.1085 | 607.1093 | -1.44 | 423.0718,305.0665,125.0243                   | C <sub>30</sub> H <sub>24</sub> O <sub>14</sub> |
| 3'-Galloylprodelphinidin B2     | 4.67 | 761.1341 | 761.1359 | -2.41 | 423.0718,407.0766,761.1339,609.1234,177.0191 | C <sub>37</sub> H <sub>30</sub> O <sub>18</sub> |
| 3,3'-Digalloylprodelphinidin B2 | 5.38 | 913.1573 |          | 3.38  | 761.1341,743.1233,125.0243                   | C <sub>44</sub> H <sub>34</sub> O <sub>22</sub> |
| (2R,3S,4S)-leucocyanidin        | 6.78 | 306.0738 | 305.0667 | -0.39 | 183.0296,125.0243,161.0243,30                | C <sub>15</sub> H <sub>14</sub> O <sub>7</sub>  |

|                                              |       |          |          |       |                               |                                                  |
|----------------------------------------------|-------|----------|----------|-------|-------------------------------|--------------------------------------------------|
| yanidin                                      |       |          |          |       | 5.0665                        |                                                  |
| Epiafzelechin                                |       |          |          |       |                               |                                                  |
| 3-O-gallate-(4bet                            | 7.18  | 881.1551 | 881.1571 | -2.17 | 179.0348,287.0558,269.0455    | C <sub>44</sub> H <sub>34</sub> O <sub>20</sub>  |
| a->6)-epigallocat                            |       |          |          |       |                               |                                                  |
| echin 3-O-gallate                            |       |          |          |       |                               |                                                  |
| (-)-Epiafzelechin                            | 8.12  | 426.0949 | 425.0878 | -0.31 | 289.0714,183.0296,273.0762,42 | C <sub>22</sub> H <sub>18</sub> O <sub>9</sub>   |
| 3-gallate                                    |       |          |          |       | 5.0874                        |                                                  |
| <b>Theaflavins</b>                           |       |          |          |       |                               |                                                  |
| Theaflavin                                   | 9.54  | 563.1189 | 563.1195 | -0.99 | 125.0244,269.0455,425.0876    | C <sub>29</sub> H <sub>24</sub> O <sub>12</sub>  |
| <b>Coumarins</b>                             |       |          |          |       |                               |                                                  |
| Aegelinol                                    | 5.74  | 246.0886 | 245.0819 | -2.35 | 203.0707,245.0812,187.0397,22 | C <sub>14</sub> H <sub>14</sub> O <sub>4</sub>   |
|                                              |       |          |          |       | 1.0813,159.0450               |                                                  |
| Cleomiscosin A                               | 6.12  | 431.0985 | 385.0929 | 0.38  | 245.0452,417.0832             | C <sub>20</sub> H <sub>18</sub> O <sub>8</sub>   |
| <b>Saccharides and glycoside derivatives</b> |       |          |          |       |                               |                                                  |
| 1-alpha-D-galact                             |       |          |          |       |                               |                                                  |
| osyl-sn-glycerol                             | 0.77  | 333.0593 | 333.0592 | 0.25  | 333.0593,241.0112,152.9957,96 | C <sub>9</sub> H <sub>19</sub> O <sub>11</sub> P |
| 3-phosphate                                  |       |          |          |       | .9665,78.9587                 |                                                  |
| 3-beta-Gentiobio                             | 0.88  | 504.1683 | 503.1618 | -1.40 | 191.0557,                     | C <sub>18</sub> H <sub>32</sub> O <sub>16</sub>  |
| syglucose                                    |       |          |          |       | 341.1088,473.1508,503.1609    |                                                  |
| D-Galactopyran                               |       |          |          |       |                               |                                                  |
| osyl-(1->3)-D-gal                            | 0.88  | 519.1566 | 473.1512 | -0.12 | 191.0557,341.1088             | C <sub>17</sub> H <sub>30</sub> O <sub>15</sub>  |
| actopyranosyl-(1                             |       |          |          |       |                               |                                                  |
| ->3)-L-arabinose                             |       |          |          |       |                               |                                                  |
| beta-Glucogallin                             | 2.23  | 331.0670 | 331.0671 | -0.10 | 169.0142                      | C <sub>13</sub> H <sub>16</sub> O <sub>10</sub>  |
| Glucogallin                                  | 2.48  | 331.0670 | 331.0671 | -0.06 | 169.0140,125.0242,331.0678    | C <sub>13</sub> H <sub>16</sub> O <sub>10</sub>  |
| 1,2-Digalloyl-bet                            |       |          |          |       |                               |                                                  |
| a-D-glucopyrano                              | 2.70  | 465.0674 | 483.0780 | -0.12 | 169.0142                      | C <sub>20</sub> H <sub>20</sub> O <sub>14</sub>  |
| se                                           |       |          |          |       |                               |                                                  |
| 1,6-bis-O-galloyl                            | 4.24  | 483.0774 | 483.0780 | -1.26 | 169.0141,423.0580,271.0457,17 | C <sub>20</sub> H <sub>20</sub> O <sub>14</sub>  |
| -beta-D-glucose                              |       |          |          |       | 7.0194,211.0143               |                                                  |
| 1,6-Digalloyl-bet                            |       |          |          |       |                               |                                                  |
| a-D-glucopyrano                              | 4.53  | 483.0775 | 483.0780 | -1.02 | 423.0579,169.0143,271.0457,21 | C <sub>20</sub> H <sub>20</sub> O <sub>14</sub>  |
| se                                           |       |          |          |       | 1.0245                        |                                                  |
| 1,3,4-Trigalloyl-b                           |       |          |          |       |                               |                                                  |
| eta-D-glucopyra                              | 6.15  | 636.0977 | 635.0890 | 2.31  | 635.0874,465.0671,169.0141,48 | C <sub>27</sub> H <sub>24</sub> O <sub>18</sub>  |
| nose                                         |       |          |          |       | 3.0774,125.0242               |                                                  |
| <b>Linalool glycosides</b>                   |       |          |          |       |                               |                                                  |
| Linalool oxide D                             |       |          |          |       |                               |                                                  |
| 3-[apiosyl-(1->6)-                           | 7.47  | 509.2239 | 463.2185 | -0.25 | 331.1765                      | C <sub>21</sub> H <sub>36</sub> O <sub>11</sub>  |
| glucoside]                                   |       |          |          |       |                               |                                                  |
| Linalool                                     |       |          |          |       |                               |                                                  |
| 3,6-oxide                                    | 8.18  | 464.2250 | 463.2185 | -1.65 | 331.1761,463.2178,161.0456    | C <sub>21</sub> H <sub>36</sub> O <sub>11</sub>  |
| primeveroside                                |       |          |          |       |                               |                                                  |
| L-Linalool                                   | 10.67 | 448.2304 | 447.2236 | -0.94 | 315.1816,447.2241             | C <sub>21</sub> H <sub>36</sub> O <sub>10</sub>  |

3-[xylosyl-(1->6)-  
glucoside]

**Tannins**

|                                                              |      |          |          |       |                                         |                                                 |
|--------------------------------------------------------------|------|----------|----------|-------|-----------------------------------------|-------------------------------------------------|
| Methyl<br>6-O-galloyl-beta-<br>D-glucopyranosi<br>de         | 3.65 | 345.0827 | 345.0827 | -0.19 | 183.0297,225.0402                       | C <sub>14</sub> H <sub>18</sub> O <sub>10</sub> |
| Samarangenin A                                               | 4.67 | 759.1184 | 759.1203 | -2.43 | 423.0718,609.1234,591.1130,28<br>9.0715 | C <sub>37</sub> H <sub>28</sub> O <sub>18</sub> |
| Samarangenin B                                               | 5.83 | 911.1294 | 911.1313 | -1.99 | 457.0773,169.0141,125.0243              | C <sub>44</sub> H <sub>32</sub> O <sub>22</sub> |
| Methyl<br>2,3,6-tri-O-galloy<br>1-beta-D-glucopy<br>ranoside | 6.91 | 650.1148 | 649.1046 | 4.45  | 169.0142,477.0682,479.0801              | C <sub>28</sub> H <sub>26</sub> O <sub>18</sub> |

**Lipids**

|                                                     |       |          |          |       |                            |                                                      |
|-----------------------------------------------------|-------|----------|----------|-------|----------------------------|------------------------------------------------------|
| Gingerglycolipid<br>A                               | 16.34 | 676.3649 | 675.3597 | -3.09 | 397.1348,415.1452,277.2171 | C <sub>33</sub> H <sub>56</sub> O <sub>14</sub>      |
| LysoPC(18:3(9Z,<br>12Z,15Z))                        | 16.59 | 562.3144 | 516.3096 | -1.15 | 277.2169,502.2932          | C <sub>26</sub> H <sub>48</sub> NO <sub>7</sub><br>P |
| 2-linoleoyl-sn-gl<br>ycero-3-phospho<br>choline     | 17.09 | 564.3305 | 518.3252 | -0.35 | 279.2325,504.3089          | C <sub>26</sub> H <sub>50</sub> NO <sub>7</sub><br>P |
| 1-pentadecanoyl<br>-sn-glycero-3-ph<br>osphocholine | 17.49 | 480.3090 | 480.3096 | -1.24 | 255.2323,480.3091          | C <sub>23</sub> H <sub>48</sub> NO <sub>7</sub><br>P |
| LysoPC(16:0)                                        | 17.49 | 540.3304 | 494.3252 | -0.60 | 255.2323,480.3090          | C <sub>24</sub> H <sub>50</sub> NO <sub>7</sub><br>P |
| LysoPC(18:1(9Z)<br>)                                | 17.71 | 566.3460 | 520.3409 | -0.69 | 281.2482,506.3243          | C <sub>26</sub> H <sub>52</sub> NO <sub>7</sub><br>P |

**Others**

|                                       |      |          |          |       |                   |                                                |
|---------------------------------------|------|----------|----------|-------|-------------------|------------------------------------------------|
| 4-coumaroyltriac<br>etic acid lactone | 7.16 | 272.0684 | 271.0612 | -0.23 | 125.0243,245.0813 | C <sub>15</sub> H <sub>12</sub> O <sub>5</sub> |
|---------------------------------------|------|----------|----------|-------|-------------------|------------------------------------------------|

---
