# Supplementary material for: Chemical and Quality Analysis of Beauty Tea Processed from Fresh Leaves of Tieguanyin Variety with Different Puncturing Degrees
Source: MDPI journal article supplement (doi:10.3390/foods12091737), 2023-04-22
Supplement: s1 [file s1]

**Table S3.** The volatile components with OA Vs  $\geq 1$ .

| No. | Compounds                                                                  | OT<br>( $\mu\text{g/kg}$ ) | Odour<br>Description          | OAVs    |         |         |
|-----|----------------------------------------------------------------------------|----------------------------|-------------------------------|---------|---------|---------|
|     |                                                                            |                            |                               | NPBT    | LPBT    | HPBT    |
| 1   | 1,6-octadien-3-ol, 3,7-dimethyl-                                           | 0.006                      | floral, fruity                | 3758.33 | 3876.67 | 3828.33 |
| 2   | 1,5,7-octatrien-3-ol, 3,7-dimethyl-                                        | 0.65                       | floral, fruity                | 66.32   | 94.69   | 160.09  |
| 3   | geraniol                                                                   | 0.0066                     | floral, sweet                 | 2240.91 | 1710.61 | 1410.61 |
| 4   | cedrol                                                                     | 0.5                        | cedarwood-like                | 2.18    | -       | -       |
| 5   | cis-linalool oxide                                                         | 0.32                       | sweet, floral, cream          | 38.34   | 48.75   | 95.25   |
| 6   | benzeneacetaldehyde                                                        | 0.0063                     | floral, fruity, sweet         | 798.41  | 473.02  | 1003.17 |
| 7   | decanal                                                                    | 0.1                        | sweet, floral,<br>citrus-like | 44.7    | 52.3    | 54.6    |
| 8   | 1-cyclohexene-1-carboxaldehyde,<br>2,6,6-trimethyl-( $\beta$ -cyclocitral) | 0.003                      | fruity, fresh and<br>sweet    | 813.33  | 1466.67 | 1443.33 |
| 9   | methyl salicylate                                                          | 0.04                       | holly oil, minty              | 163.5   | 149.25  | 152     |
| 10  | furan, 2-pentyl-                                                           | 4.8                        | fruity, green                 | -       | 2.45    | -       |
