# Supplementary material for: Chemical and Quality Analysis of Beauty Tea Processed from Fresh Leaves of Tieguanyin Variety with Different Puncturing Degrees
Source: MDPI journal article supplement (doi:10.3390/foods12091737), 2023-04-22
Supplement: s1 [file s1]

**Table S2. The information on 65 non-volatile differential metabolites in beauty tea.**

| metabolite name                                             | TR<br>(min) | accurate<br>mass | theoretical<br>mass | ppm   | MS/MS ions                                       | formula                                         | Ref. |
|-------------------------------------------------------------|-------------|------------------|---------------------|-------|--------------------------------------------------|-------------------------------------------------|------|
| <b>Catechins and their derivatives</b>                      |             |                  |                     |       |                                                  |                                                 |      |
| Theacitrin A                                                | 6.44        | 759.1222         | 759.1203            | 2.47  | 169.0143,455.0616,607.108<br>6,483.0573          | C <sub>37</sub> H <sub>28</sub> O <sub>18</sub> |      |
| (-)-Epigallocatechin                                        | 6.79        | 306.0741         | 305.0667            | 0.55  | 125.0245,124.0167,139.040<br>3,179.0353,305.0665 | C <sub>15</sub> H <sub>14</sub> O <sub>7</sub>  |      |
| Epicatechin                                                 |             |                  |                     |       |                                                  |                                                 |      |
| 3-O-(3-O-methylgal<br>late)                                 | 8.12        | 456.1056         | 455.0984            | -0.19 | 289.0716,183.0297,124.016<br>7                   | C <sub>23</sub> H <sub>20</sub> O <sub>10</sub> |      |
| 3,5-Digalloylepicat<br>echin                                | 8.26        | 593.0934         | 593.0937            | -0.53 | 441.0833,423.0718,593.097<br>6                   | C <sub>29</sub> H <sub>22</sub> O <sub>14</sub> |      |
| (-)-Epigallocatechin<br>3,3'-di-gallate                     | 9.06        | 591.0782         | 609.0886            | 0.34  | 169.0146,287.0199                                | C <sub>29</sub> H <sub>22</sub> O <sub>15</sub> |      |
| Epigallocatechin<br>3-O-gallate-(4beta-<br>>6)-epicatechin  | 6.18        | 898.1616         | 897.1520            | 2.50  | 745.1390,169.0143,897.149<br>9,727.1284          | C <sub>44</sub> H <sub>34</sub> O <sub>21</sub> |      |
| 3-O-gallate<br>Epicatechin                                  |             |                  |                     |       |                                                  |                                                 |      |
| 3-O-gallate-(4beta-<br>>6)-epigallocatechi<br>n 3-O-gallate | 7.81        | 898.1625         | 897.1520            | 3.60  | 169.0144                                         | C <sub>44</sub> H <sub>34</sub> O <sub>21</sub> |      |
| Epicatechin-(4beta-<br>>8)-epigallocatechi<br>n 3-O-gallate | 7.82        | 746.1469         | 745.1410            | -1.94 | 289.0719,125.0245                                | C <sub>37</sub> H <sub>30</sub> O <sub>17</sub> |      |
| Theasinensin B                                              | 9.07        | 743.1246         | 767.1829            | -0.96 | 169.0147,591.0901                                | C <sub>37</sub> H <sub>30</sub> O <sub>18</sub> |      |
| Procyanidin A2                                              | 9.30        | 575.1187         | 575.1195            | -1.39 | 539.1004                                         | C <sub>30</sub> H <sub>24</sub> O <sub>12</sub> |      |
| Epigallocatechin-(4<br>beta->8)-epicatechi<br>n 3-O-gallate | 10.02       | 727.1301         | 745.1410            | -0.41 | 593.1288                                         | C <sub>37</sub> H <sub>30</sub> O <sub>17</sub> |      |
| <b>Flavones and flavonols/their glycoside</b>               |             |                  |                     |       |                                                  |                                                 |      |
| (3''-Apiosyl-6''-mal<br>onyl)astragalin                     | 2.27        | 647.1239         | 665.1359            | -2.23 | 125.0244,455.0614,437.051<br>2                   | C <sub>29</sub> H <sub>30</sub> O <sub>18</sub> |      |
| Myricetin<br>3-O-glucoside                                  | 6.46        | 480.0902         | 479.0831            | -0.50 | 316.0226,318.0315                                | C <sub>21</sub> H <sub>20</sub> O <sub>13</sub> |      |
| 2-hydroxy-5-methy<br>lquinone                               | 6.79        | 183.0298         | 137.0244            | -0.47 | 183.0298,125.0245,168.006<br>5                   | C <sub>7</sub> H <sub>6</sub> O <sub>3</sub>    |      |
| Quercetin                                                   |             |                  |                     |       |                                                  |                                                 |      |
| 3-(2-glucosylrhamn<br>oside)                                | 7.04        | 609.1452         | 609.1461            | -1.52 | 609.1446,413.0875,577.154<br>8,301.0348,300.0274 | C <sub>27</sub> H <sub>30</sub> O <sub>16</sub> |      |
| Plantagoside                                                | 7.09        | 465.1029         | 465.1039            | -2.06 | 313.0918,151.0040,465.101<br>0                   | C <sub>21</sub> H <sub>22</sub> O <sub>12</sub> |      |

|                                                                                      |       |          |           |       |                                              |                                                 |
|--------------------------------------------------------------------------------------|-------|----------|-----------|-------|----------------------------------------------|-------------------------------------------------|
| Isoquercitrin                                                                        | 7.13  | 463.0846 | 463.0882  | -7.75 | 300.0273,302.0378                            | C <sub>21</sub> H <sub>20</sub> O <sub>12</sub> |
| Oolonghomobisflavan A                                                                | 7.59  | 928.1677 | 927.1626  | -2.30 | 169.0144,573.1033,125.0246                   | C <sub>45</sub> H <sub>36</sub> O <sub>22</sub> |
| Isoengelitin                                                                         | 8.27  | 433.1143 | 433.1140  | 0.56  | 271.0609,125.0246                            | C <sub>21</sub> H <sub>22</sub> O <sub>10</sub> |
| Isolariciresinol                                                                     |       |          |           |       |                                              |                                                 |
| 4'-O-beta-D-glucoside                                                                | 8.34  | 522.2094 | 521.2028  | -1.37 | 341.1395,279.0877                            | C <sub>26</sub> H <sub>34</sub> O <sub>11</sub> |
| Aspalathin                                                                           | 8.59  | 497.1330 | 451.1246  | 6.53  | 453.1431,497.1328                            | C <sub>21</sub> H <sub>24</sub> O <sub>11</sub> |
| Quercetin                                                                            |       |          |           |       |                                              |                                                 |
| 3-(6'''-p-coumarylglucosyl)(1->2)-rhamnoside 7-glucoside                             | 8.84  | 918.2455 | 917.2357  | 2.76  | 289.0719,441.0828,561.1381                   | C <sub>42</sub> H <sub>46</sub> O <sub>23</sub> |
| Kaempferol                                                                           |       |          |           |       |                                              |                                                 |
| 3-O-caffeoyl-sophoroside                                                             | 8.87  | 933.2295 | 933.2306  | -1.25 | 441.0827,933.2291                            | C <sub>42</sub> H <sub>46</sub> O <sub>24</sub> |
| 7-O-glucoside                                                                        |       |          |           |       |                                              |                                                 |
| Kaempferol                                                                           |       |          |           |       |                                              |                                                 |
| 3-O-[6-(4-coumaroyl)-beta-D-glucosyl-(1->2)-beta-D-glucosyl-(1->2)-beta-D-glucoside] | 9.15  | 458.1149 | 917.2357  | 1.56  | 145.0296,615.1918,285.0404                   | C <sub>42</sub> H <sub>46</sub> O <sub>23</sub> |
| Kaempferol                                                                           |       |          |           |       |                                              |                                                 |
| 3-neohesperidoside                                                                   | 9.37  | 531.1441 | 1063.2936 | 1.77  | 755.1819,901.2379,431.0977,145.0295          | C <sub>48</sub> H <sub>56</sub> O <sub>27</sub> |
| -7-(2''-p-coumaryllaminaribioside)                                                   |       |          |           |       |                                              |                                                 |
| 2''-(6''-p-Coumaroylglucosyl)quercitrin                                              | 9.37  | 756.1924 | 755.1829  | 2.89  | 285.0403,145.0295,450.1167,301.0351,431.0979 | C <sub>36</sub> H <sub>36</sub> O <sub>18</sub> |
| Kaempferol                                                                           |       |          |           |       |                                              |                                                 |
| 2G-coumaroylrutinoside                                                               | 9.80  | 739.1861 | 739.1880  | -2.56 | 285.0404,593.1298,739.1863                   | C <sub>36</sub> H <sub>36</sub> O <sub>17</sub> |
| 7-O-(4-Hydroxycinnamoyl) astragalin                                                  | 15.53 | 593.1293 | 593.1301  | -1.23 | 593.1303,549.1040,505.1136                   | C <sub>30</sub> H <sub>26</sub> O <sub>13</sub> |

#### Phenolic acids

|                            |      |          |          |       |                                     |                                                 |
|----------------------------|------|----------|----------|-------|-------------------------------------|-------------------------------------------------|
| Gallic acid                | 2.25 | 169.0143 | 169.0143 | 0.37  | 125.0243,124.0167                   | C <sub>7</sub> H <sub>6</sub> O <sub>5</sub>    |
| Theogallinin               | 3.48 | 799.1335 | 799.1363 | -3.51 | 437.0515,455.0621,153.0192,607.0740 | C <sub>36</sub> H <sub>32</sub> O <sub>21</sub> |
| 3-O-p-Coumaroylquinic acid | 6.62 | 337.0934 | 337.0929 | 1.45  | 191.0560                            | C <sub>16</sub> H <sub>18</sub> O <sub>8</sub>  |
| Ellagic acid               | 6.87 | 300.9991 | 300.9990 | 0.41  | 300.9987,283.9962                   | C <sub>14</sub> H <sub>6</sub> O <sub>8</sub>   |

#### Amino acids

|            |      |          |          |      |                   |                                                              |                    |
|------------|------|----------|----------|------|-------------------|--------------------------------------------------------------|--------------------|
| L-Theanine | 1.25 | 174.1005 | 173.0932 | 0.20 | 155.0831,173.0931 | C <sub>7</sub> H <sub>14</sub> N <sub>2</sub> O <sub>3</sub> | Authentic standard |
|------------|------|----------|----------|------|-------------------|--------------------------------------------------------------|--------------------|

**Organic acids**

|                                         |      |          |          |      |                   |                                                |
|-----------------------------------------|------|----------|----------|------|-------------------|------------------------------------------------|
| 12-O-β-D-Glucopyranosyloxyjasmonic acid | 5.95 | 387.1661 | 387.1661 | 0.09 | 173.0456,387.1657 | C <sub>18</sub> H <sub>28</sub> O <sub>9</sub> |
|-----------------------------------------|------|----------|----------|------|-------------------|------------------------------------------------|

|                |      |          |          |       |                   |                                                |
|----------------|------|----------|----------|-------|-------------------|------------------------------------------------|
| Achimilic acid | 9.40 | 555.2233 | 277.1082 | -0.42 | 507.2021,477.1931 | C <sub>15</sub> H <sub>18</sub> O <sub>5</sub> |
|----------------|------|----------|----------|-------|-------------------|------------------------------------------------|

**Proanthocyanidins**

|                                 |      |          |          |      |                                         |                                                 |
|---------------------------------|------|----------|----------|------|-----------------------------------------|-------------------------------------------------|
| 3,3'-Digalloylprodelphinidin B2 | 5.22 | 456.0706 | 913.1469 | 1.77 | 743.1234,761.1335,137.024<br>5,447.0717 | C <sub>44</sub> H <sub>34</sub> O <sub>22</sub> |
|---------------------------------|------|----------|----------|------|-----------------------------------------|-------------------------------------------------|

|                             |      |          |          |       |          |                                                |
|-----------------------------|------|----------|----------|-------|----------|------------------------------------------------|
| (-)-Epiafzelechin-3-gallate | 5.93 | 851.1814 | 425.0878 | -1.77 | 289.0717 | C <sub>22</sub> H <sub>18</sub> O <sub>9</sub> |
|-----------------------------|------|----------|----------|-------|----------|------------------------------------------------|

Epiafzelechin

|                                                     |      |          |          |       |                                |                                                 |
|-----------------------------------------------------|------|----------|----------|-------|--------------------------------|-------------------------------------------------|
| 3-O-gallate-(4beta->6)-epigallocatechin-3-O-gallate | 6.11 | 927.1576 | 881.1571 | -5.63 | 591.1128,573.1025,743.123<br>3 | C <sub>44</sub> H <sub>34</sub> O <sub>20</sub> |
|-----------------------------------------------------|------|----------|----------|-------|--------------------------------|-------------------------------------------------|

|                                                     |      |          |          |      |                                                  |                                                 |
|-----------------------------------------------------|------|----------|----------|------|--------------------------------------------------|-------------------------------------------------|
| Epiafzelechin-(4beta->6)-epicatechin-3,3'-digallate | 7.42 | 866.1722 | 865.1622 | 3.22 | 865.1601,713.1491,695.139<br>1,423.0721,169.0143 | C <sub>44</sub> H <sub>34</sub> O <sub>19</sub> |
|-----------------------------------------------------|------|----------|----------|------|--------------------------------------------------|-------------------------------------------------|

**Theaflavins**

|                          |      |          |          |       |                                         |                                                 |
|--------------------------|------|----------|----------|-------|-----------------------------------------|-------------------------------------------------|
| Isotheaflavin-3'-gallate | 4.09 | 761.1338 | 715.1305 | -2.92 | 591.1130,609.1234,761.133<br>7,453.0823 | C <sub>36</sub> H <sub>28</sub> O <sub>16</sub> |
|--------------------------|------|----------|----------|-------|-----------------------------------------|-------------------------------------------------|

|               |      |          |          |       |                   |                                                 |
|---------------|------|----------|----------|-------|-------------------|-------------------------------------------------|
| Theaflavate B | 4.55 | 745.1391 | 699.1355 | -2.71 | 169.0144,593.1295 | C <sub>36</sub> H <sub>28</sub> O <sub>15</sub> |
|---------------|------|----------|----------|-------|-------------------|-------------------------------------------------|

|                           |      |          |          |       |                                         |                                                 |
|---------------------------|------|----------|----------|-------|-----------------------------------------|-------------------------------------------------|
| Theaflavin-3,3'-digallate | 5.40 | 913.1447 | 867.1414 | -2.57 | 423.0717,743.1230,761.134<br>2,125.0245 | C <sub>43</sub> H <sub>32</sub> O <sub>20</sub> |
|---------------------------|------|----------|----------|-------|-----------------------------------------|-------------------------------------------------|

|                         |      |          |          |       |                                                  |                                                 |
|-------------------------|------|----------|----------|-------|--------------------------------------------------|-------------------------------------------------|
| Neotheaflavin-3-gallate | 7.23 | 761.1346 | 715.1305 | -1.86 | 460.0551,416.0655,727.129<br>6,683.1400,591.1140 | C <sub>36</sub> H <sub>28</sub> O <sub>16</sub> |
|-------------------------|------|----------|----------|-------|--------------------------------------------------|-------------------------------------------------|

|            |      |          |          |       |                                |                                                 |
|------------|------|----------|----------|-------|--------------------------------|-------------------------------------------------|
| Theaflavin | 9.53 | 563.1190 | 563.1195 | -0.88 | 269.0456,137.0246,425.087<br>2 | C <sub>29</sub> H <sub>24</sub> O <sub>12</sub> |
|------------|------|----------|----------|-------|--------------------------------|-------------------------------------------------|

**Saccharides and glycoside derivatives**

|                           |      |          |          |       |                                |                                               |
|---------------------------|------|----------|----------|-------|--------------------------------|-----------------------------------------------|
| 6-O-acetyl-beta-D-glucose | 0.85 | 267.0719 | 221.0667 | -1.17 | 191.0559,192.0593,267.072<br>2 | C <sub>8</sub> H <sub>14</sub> O <sub>7</sub> |
|---------------------------|------|----------|----------|-------|--------------------------------|-----------------------------------------------|

|                  |      |          |          |       |                                |                                                 |
|------------------|------|----------|----------|-------|--------------------------------|-------------------------------------------------|
| 3-Fucosyllactose | 0.86 | 533.1717 | 487.1668 | -1.27 | 191.0559,192.0593,473.150<br>5 | C <sub>18</sub> H <sub>32</sub> O <sub>15</sub> |
|------------------|------|----------|----------|-------|--------------------------------|-------------------------------------------------|

|              |      |          |          |     |                                |                                                 |
|--------------|------|----------|----------|-----|--------------------------------|-------------------------------------------------|
| isomaltulose | 0.87 | 342.1164 | 341.1089 | 0.5 | 191.0558,473.1504,341.108<br>9 | C <sub>12</sub> H <sub>22</sub> O <sub>11</sub> |
|--------------|------|----------|----------|-----|--------------------------------|-------------------------------------------------|

D-Gal alpha

|                 |      |          |          |       |                   |                                                 |
|-----------------|------|----------|----------|-------|-------------------|-------------------------------------------------|
| 1->6D-Gal alpha | 0.87 | 549.1666 | 503.1618 | -1.20 | 191.0558,473.1505 | C <sub>18</sub> H <sub>32</sub> O <sub>16</sub> |
|-----------------|------|----------|----------|-------|-------------------|-------------------------------------------------|

1-&gt;6D-Glucose

1-Hexanol

|                     |      |          |          |      |          |                                                 |
|---------------------|------|----------|----------|------|----------|-------------------------------------------------|
| arabinosylglucoside | 8.33 | 377.1818 | 395.1923 | 0.30 | 281.0839 | C <sub>17</sub> H <sub>32</sub> O <sub>10</sub> |
|---------------------|------|----------|----------|------|----------|-------------------------------------------------|

|                  |      |          |          |      |          |                                                 |
|------------------|------|----------|----------|------|----------|-------------------------------------------------|
| beta-Glucogallin | 2.48 | 331.0672 | 331.0671 | 0.26 | 169.0142 | C <sub>13</sub> H <sub>16</sub> O <sub>10</sub> |
|------------------|------|----------|----------|------|----------|-------------------------------------------------|

|                                    |      |          |          |       |          |                                                 |
|------------------------------------|------|----------|----------|-------|----------|-------------------------------------------------|
| 1,2-Digalloyl-beta-D-glucopyranose | 4.25 | 483.0777 | 483.0780 | -0.76 | 169.0143 | C <sub>20</sub> H <sub>20</sub> O <sub>14</sub> |
|------------------------------------|------|----------|----------|-------|----------|-------------------------------------------------|

|                                                                    |       |          |          |       |                                              |                                                   |
|--------------------------------------------------------------------|-------|----------|----------|-------|----------------------------------------------|---------------------------------------------------|
| 1,6-bis-O-galloyl-beta-D-glucose                                   | 4.54  | 483.0777 | 483.0780 | -0.62 | 169.0144,423.0569,271.0456                   | C <sub>20</sub> H <sub>20</sub> O <sub>14</sub>   |
| khelloside                                                         | 4.81  | 407.0981 | 407.0984 | -0.61 | 245.0452,343.0467,246.0489                   | C <sub>19</sub> H <sub>20</sub> O <sub>10</sub>   |
| Jasmolone glucoside                                                | 5.74  | 387.1661 | 341.1606 | 0.06  | 173.0459,387.1665,163.1132,191.0562          | C <sub>17</sub> H <sub>26</sub> O <sub>7</sub>    |
| <b>Terpenoids</b>                                                  |       |          |          |       |                                              |                                                   |
| Linalool oxide D                                                   |       |          |          |       |                                              |                                                   |
| 3-[apiosyl-(1->6)-glucoside]                                       | 7.47  | 509.2240 | 463.2185 | 0.08  | 331.1771                                     | C <sub>21</sub> H <sub>36</sub> O <sub>11</sub>   |
| Linalool 3,6-oxide primeveroside                                   | 7.69  | 464.2252 | 463.2185 | -1.3  | 331.1764,463.2181                            | C <sub>21</sub> H <sub>36</sub> O <sub>11</sub>   |
| Linalool 3,7-oxide beta-primeveroside                              | 8.17  | 464.2252 | 463.2185 | -1.26 | 331.1761,463.2178,161.0456                   | C <sub>21</sub> H <sub>36</sub> O <sub>11</sub>   |
| L-Linalool                                                         |       |          |          |       |                                              |                                                   |
| 3-[xylosyl-(1->6)-glucoside]                                       | 10.66 | 448.2304 | 447.2236 | -0.94 | 315.1821,447.2246                            | C <sub>21</sub> H <sub>36</sub> O <sub>10</sub>   |
| <b>Tannins</b>                                                     |       |          |          |       |                                              |                                                   |
| Theaflavic acid                                                    | 3.71  | 473.0726 | 427.0671 | 0.05  | 167.0355,319.0459,439.0671                   | C <sub>21</sub> H <sub>16</sub> O <sub>10</sub>   |
| Methyl                                                             |       |          |          |       |                                              |                                                   |
| 2,3,6-tri-O-galloyl-beta-D-glucopyranoside                         | 6.91  | 650.1145 | 649.1046 | 4.03  | 169.0142,125.0246,649.1032                   | C <sub>28</sub> H <sub>26</sub> O <sub>18</sub>   |
| Samarangenin A                                                     | 7.81  | 759.1194 | 759.1203 | -1.15 | 727.1288,169.0143,575.1183,289.0719,589.0984 | C <sub>37</sub> H <sub>28</sub> O <sub>18</sub>   |
| <b>Lipids</b>                                                      |       |          |          |       |                                              |                                                   |
| Diosbulbinoside F                                                  | 6.61  | 538.2049 | 537.1978 | -0.25 | 191.0561,491.1915                            | C <sub>26</sub> H <sub>34</sub> O <sub>12</sub>   |
| LysoPC(18:1(9Z))                                                   | 17.71 | 566.3446 | 520.3409 | -3.31 | 281.2484,506.3251                            | C <sub>26</sub> H <sub>52</sub> NO <sub>7</sub> P |
| (1beta,2alpha,3alpha)-1,2,3,24-Tetrahydroxy-12-oleanen-28-oic acid | 18.03 | 485.3274 | 503.3378 | 0.21  | 353.2126,485.3273,163.1132                   | C <sub>30</sub> H <sub>48</sub> O <sub>6</sub>    |
| <b>Others</b>                                                      |       |          |          |       |                                              |                                                   |
| Phaeophorbide b                                                    | 18.31 | 605.2398 | 605.2406 | -1.26 | 529.2244                                     | C <sub>35</sub> H <sub>34</sub> N <sub>4</sub> O  |
